# Supplementary material for: A derecho climatology (2004–2021) in the United States based on machine learning identification of bow echoes
Source: Copernicus journal article supplement (doi:10.5194/essd-2024-112), 2024-06-24
Supplement: Supplementary file [file essd-2024-112-AC1-supplement.pdf]

## Response to Reviewer #1

Thank you for your careful and thorough reading of the manuscript and your thoughtful comments and suggestions. We apologize for the delay in revising the manuscript, as we spent a significant amount of time on the manual validation and inspection of the identified derechos. According to all three reviewers' comments and suggestions, we have made several significant improvements in our manuscript, which we want to highlight before the point-by-point response.

Firstly, we have changed the wording of some terms so that they are more distinguishable and accurate, and we have also improved the language of many sentences so that the manuscript is more understandable. A derecho is a windstorm, while an MCS is a convective system. They are different concepts. Therefore, we change "derecho" to "derecho-producing MCS" when we refer to the MCS associated with a derecho, and "derecho feature" has been changed to "derecho." The dataset developed in this study includes tracking of both derechos and corresponding derecho-producing MCSs.

Secondly, we have incorporated a "forward propagating" criterion in our derecho detection algorithm. Our initial understanding of the term "forward propagating" was incomplete, and we failed to recognize its critical role in defining a derecho proposed by Corfidi et al. (2016). After careful consideration and evaluation, we have adopted and modified two criteria from Corfidi et al. (2016) to establish the definition of "forward propagating." One is that the acute angle between the averaged bow echo orientation and the bow echo series' propagation direction is larger than  $45^\circ$ , and the other is that the bow echo series' propagation speed is at least 30% faster than the 500-hPa background wind speed. Implementing the "forward propagating" criterion removes many windstorms externally forced by extratropical cyclones, aligning with the purpose of Corfidi et al. (2016), which intends to define derechos as internally driven windstorms. "Externally forced" and "internally driven" reflect distinct physical formation mechanisms of those windstorms, which is why Corfidi et al. (2016) proposed a physically based derecho definition. With the updated detection algorithm, the derecho number between 2004 and 2021 has been substantially reduced from 556 to 274 (for ISD) and 220 (for SED). In addition, due to the inclusion of the "forward propagating" constraint in our derecho algorithm, we have decided not to change the name of our dataset to "high wind-producing bow echo." We have updated all the results in Section 6 based on the improved dataset.

Thirdly, we have developed another parallel dataset using gust speeds from the Storm Events Database (SED). Now, our derecho dataset consists of two subsets: one based on gust measurements from the global hourly Integrated Surface Database (ISD) and the other based on SED gust speeds. Although there are some discrepancies between the two subsets, their agreement is much larger than their difference (Figures 9-12 in the revised main manuscript; or Figure R1 below). Moreover, both ISD and SED gust speeds have limitations and uncertainties, hence differences between the ISD-based and the SED-based datasets are expected and understandable. In addition, it also indicates that our usage of lower gust speed criteria for ISD measurements is reasonable and does not change the derecho number much. We must emphasize that using lower gust speed criteria for ISD measurements than SED reports does not mean that the ISD-identified derechos are weaker than the SED-identified ones (or even not derechos). This

is a compromise, considering that ISD stations are limited and may miss many damaging gusts, as we highlighted in Lines 460-469 in the revised main manuscript (as below).

“We emphasize that, in Criterion 4, our ISD gust speed criteria are weaker than the SED gust speed criteria as well as those of previous studies (Squitieri et al., 2023; Bentley and Mote, 1998; Johns and Hirt, 1987), which also estimated the gust swath based on SED damaging gusts. As mentioned in Section 2.2.2, most SED gust reports are estimates, while ISD provides gust measurements from weather stations. SED estimates can capture potential damaging gust occurrences over a much larger area, although with large uncertainties. In contrast, due to the limited coverage of observational sites, real-time ISD measurements may miss substantial damaging gust occurrences in nearby regions. Therefore, we lower the gust speed criteria to capture potential derechos when using ISD measurements. It does not mean that the ISD-based derechos are weaker than the SED-based ones or even not derechos, as elaborated in Section 5.”

Fourthly, due to the incorporation of “forward propagating” in the detection algorithm and the development of the SED-based derecho dataset, we have updated some sensitivity tests, evaluations, and the comparisons of our datasets with the NOAA SPC data in 2004 and 2005 and previous studies. Please see Section 5 for further details.

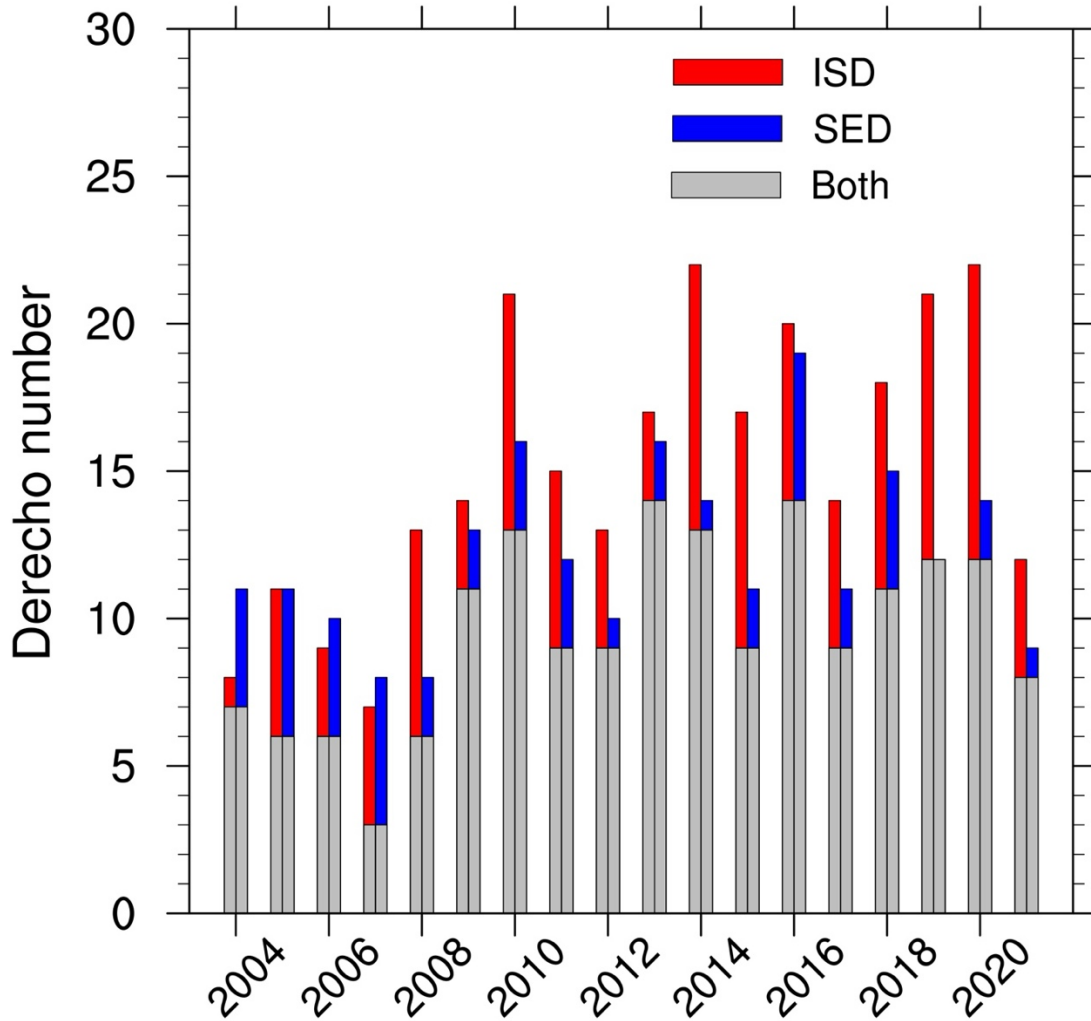

Figure R1. Bar chart of the annual derecho numbers from the ISD-based and the SED-based datasets from 2004 to 2021. Gray shading denotes derechos captured by both datasets, red shading refers to derechos only identified when using ISD gust observations, and blue shading represents SED-only derechos. The figure is the same as Figure 9 in the revised main manuscript.

*The general idea of an AI-based objective tool to identify derechos is fascinating, and such a tool could be very useful. The approach taken in this paper has promise and it is exciting that some reasonably good results are obtained. However, I feel like there were some poor choices made in the design of the tool that harm its performance, and I list those below. In addition, I wonder if the timing of a paper like this is not good, in light of the fact that a very new physics-alone-based definition of a derecho is being proposed by some severe weather scientists (e.g. Squitieri 2024, abstract 16A.3 for AMS 28th Conf. on Sev. Local. Storms). In my own work with derechos and severe thunderstorm winds in recent years, I was aware that many in the community feel the definition much change from its current unusual focus on after-the-fact wind measurements. In meteorology, we normally define things based on their physics, and it sounds like that is what is being proposed by the severe weather community within SPC, which typically has been tasked with identifying derechos. It seems it would be much better for the AI work in this present study*

*to be better coordinated with the group proposing the new definition, so that the AI tool is designed to work with the new definition. As it stands, I fear the AI tool will be obsolete from day 1, particularly in light of my concerns listed below. The Squitieri 2024 abstract indicates that the new definition reduces the number of derechos per year substantially, which would make the present study's overestimate of derechos even worse. In summary, I believe the problems associated with the design of this tool are so severe that the paper cannot be published in its current form. The AI tool is really just identifying bow echoes that produce strong winds, not derechos. This presents numerous fatal problems in the discussion of results.*

Reply:

Thank you for your comments and interest in the AI tool. As discussed in the manuscript, the segmentation CNN is used to identify bow echoes, which is only part of the derecho detection. We shared the bow echo dataset as well as the segmentation CNN code with the public on Zenodo. Any group can use the AI tool or the CNN-identified bow echoes in their studies, regardless of whether they are related to derecho detection or not.

Before submitting the manuscript, we discussed the derecho definition issue with the group that submitted the AMS abstract you mentioned. Unfortunately, we did not reach an agreement on the derecho definition. According to our understanding, except for distinct approaches to identifying bow echoes, the primary difference between our algorithm and their derecho definition is the gust speed criteria. The AMS abstract used gust speeds from SED and required a derecho to have at least five reports with gust speed  $\geq 33 \text{ m s}^{-1}$  in the 400-km long wind swath, with at least three of the  $\geq 33 \text{ m s}^{-1}$  gust reports measured; otherwise, there must be at least three damaged-estimated gust reports with a speed  $\geq 44 \text{ m s}^{-1}$ . We understand their motivation to use much stricter gust speed criteria. Those derechos have more significant socioeconomic impacts than relatively weaker ones. But it's arguable that their derecho definition is physics-based, while ours is not. Both definitions are based on Corfidi et al. (2016), where the physical parts are more reflected in the usage of bow echoes with mesovortex and/or rear-inflow jets, cold-pool driven, and forward propagating. We do not mean that different gust speeds are all generated by the same physical mechanism. They may be associated with different physical processes (which requires additional analysis after we develop a derecho dataset), but in the definition, the gust speed criteria are more related to socioeconomic impacts. As we mentioned above, even if we use SED gust reports and the same gust speed criterion from Corfidi et al. (2016) in our derecho detection algorithm, the derecho number is still similar to that based on ISD with a weaker gust speed criterion. We used a lower gust speed criterion for ISD because of the limitations and uncertainties of the gust speed dataset, and it does not mean that the ISD-based derechos are weaker or that they are not derechos. Moreover, even if NOAA plans to use stricter gust speed criteria in the future, it does not undermine our study. Our dataset is flexible, and we store all the key parameters for each derecho in the dataset, including gust speed reports from SED or ISD. Users can easily filter out stronger derechos using existing variables in our dataset if they are interested in the strong derechos, which would reduce the number of events in the full derecho dataset.

We also want to clarify that we do not intend to use the algorithm for operational purposes by developing the detection algorithm and derecho dataset. The segmentation CNN bow echo

identification is imperfect and could suffer from uncertainties, which is why we invested substantial time on manual inspection of the dataset and those MCSs that produced strong gusts. For meteorological operations in the United States, instead of manually correcting the AI detection errors, it may be easier for an experienced meteorologist to label bow echoes and identify derechos manually when the data volume is small. When the data volume is large, as in this application with 18-years of hourly data, the AI classifier is much more efficient. Besides developing the 18-year derecho climatology over the United States, we expect that the CNN bow echo identification tool and the automatic derecho detection algorithm can be used in other areas including application to model results with large volumes of data. This is another reason why we prefer to use the ISD-based derecho subset instead of the SED-based subset: other countries often do not have as much data as the United States, especially the SED data. However, many countries have some measurements from weather stations, and they can easily adapt our detection algorithm to fit their specific conditions.

*I am curious since prior definitions of derechos have included the length requirement (roughly 400 miles of damaging winds, or 650 km, in the more recent stricter definition of Corfidi et al. 2016 that you cite), why you would shorten the MCS longevity requirement to just 6 hours? If one assumes a typical MCS translation speed of 50 km/h, then an MCS lasting only 6 hours would only move over an area 300 km long, or less than half the pathlength needed in this prior definition of derechos. Even with the older 400 km pathlength requirement that you mention, many events would not meet it if moving at 50 km/h. Also, even if one acknowledges that derechos often move rather quickly (I believe the 2020 Midwestern one moved at around 90-100 km/h, which is about as fast as they can move), a 6-hour lifetime would still not result in a damage path quite long enough to match the 650 km definition. It is true that MCSs can produce significant damage with wind swaths shorter than 650 km, but if that is the focus of your work, you should not be referring to it as a derecho climatology. A high wind-producing bow echo climatology would be more appropriate for the title. In fact, in light of my opening paragraph and the ongoing efforts to change the definition of a derecho substantially, this change in title might avoid even more serious problems. It much better defines what your tool does since it is broader in its wording. I would strongly suggest that change.*

Reply:

Thank you for your comments. The wording in the last version of our manuscript might cause some confusion. We have improved the wording of some terms, as explained at the beginning of the response, which we hope can address your concern. In detail, the study aims to identify derechos (and derecho-producing MCSs) from the MCS dataset, which comprises derecho-producing MCSs and non-derecho-producing MCSs. Using a lifetime threshold of 6 hours in our MCS detection algorithm does not affect our derecho (and derecho-producing MCS) detection, which explicitly requires a gust swath of at least  $650 \times 100 \text{ km}^2$  associated with an MCS (Line 398 in the revised main manuscript, or as below).

“The gust swath must be at least 650 km in length and 100 km in width.”

According to our current dataset, the average derecho and derecho-producing MCS lifetimes are 11.4 and 27.8 hours respectively when we use ISD in our derecho detection. The numbers change to 10.5 and 29.4 hours when SED is used in the derecho algorithm.

According to our dataset, the typical derecho propagation speed is about  $25 \text{ m s}^{-1}$ , hence 650 km is roughly equivalent to 7 hours. Considering the potential CNN bow echo identification uncertainties, we change the lowest derecho duration from 2 hours to 5 hours in Line 378 in the revised main manuscript. In fact, the lifetime threshold is not so important since we have set a swath threshold of  $650 \times 100 \text{ km}^2$ , which already implies a duration threshold.

**“The derecho must persist for at least 5 hours, with a bow echo present for at least 80% of its lifetime.”**

*I am troubled by your use of the surface wind station database for the winds used in your system. This is NOT how derechos are classified operationally now. Instead, classification is based on the Storm Events Database (SED), which I would assume includes more actual measurements (such as home weather stations) and estimates of wind speed based on damage. In fact, roughly 90% of all the severe wind reports in that database do not involve a measurement and are instead estimates based on damage. The definition of a derecho that I found on SPC’s website does not restrict derecho classification to just measured winds. The Storm Events Database is rather robust for the period 2004-2021 that you are using, and thus it is puzzling why you would not have used that for your training? Your use of just the surface station database is even more puzzling considering my comment earlier that your reduction in the longevity requirement for MCSs would lead your system to call many events derechos that would not meet the past requirements of a swath of severe winds at least 650 km long (or even 400 km long in many situations). Thus, you made one choice that really makes it easier to call a system a derecho, but then this choice of where you obtain wind information would do the opposite, making it much more difficult for systems to meet prior thresholds to be called a derecho. Tirone et al. (2024) used the SED in their training of a ML tool, so there is no obstacle to using that information as a source of thunderstorm wind information. I believe you need to test the sensitivity of your results to your use of a very limited database of thunderstorm winds, by examining changes that happen if you switch to using the SED. I see that later starting at about line 350, you provide good explanation which I think deals with my concern. It seems you acknowledge the deficiencies in your choice of this surface data network for wind and thus make numerous modifications to try to account for the deficiencies (like lower wind thresholds, use of broader ellipse containing reports, etc). You talk some about how damage estimates take some time to be performed, but it is unclear if this is the primary motivation for your use of the problematic surface wind network dataset. I believe you need to provide some of this justification earlier when you first mention that surface network, since most readers familiar with severe weather reports will question why you are not using the SED. Derechos are often classified now within 24 hours of their occurrence as the process of gathering both the measurements and having some estimates is quick. From what I have read so far, I do not see a reason why 24 hours is too long for what you are doing. You need to make a stronger case for your use of the surface wind measurements. Are you planning for your tool to be used operationally in a setting where it must alert forecasters the moment that a system has reached the requirement to be called a derecho? I guess I do not see why this would be so urgent. With all ongoing derecho research that I am aware of, your tool could easily be applied one day after*

*an event, or even a week or month afterward, so there does not seem to be a valid reason to avoid using the SED.*

Reply:

Thank you for your comments. Please see our above answers and clarifications. Besides, we also want to clarify that our AI tool is only used to detect bow echoes from composite radar reflectivity. The training of our bow echo detection tool does not use gust speed.

*When you refer to bow echo samples on line 180, it would be helpful to know the time resolution of the radar images you use. In recent years, radar reflectivity images often update nearly every minute or two. For readers to be able to put into context your 566 positive identifications, they need to be able to figure out how many images in total might be getting evaluated in the normal lifetime of a derecho. It is possible the citation about Gridrad would mention the time frequency of the Gridrad products, but this is simple information to supply in your own paper and is absolutely necessary. For a derecho lasting 8 hours, if radar images are available every 5 minutes (the traditional frequency of NEXRAD scans), there would be 96 for one case, and thus your 566 total bow echo scans from 54 events would be a tiny fraction of the lifetime of the derechos. If the images are hourly, then 566 implies every hour of every derecho must include a bow echo. Thus, this information is critically important.*

Reply:

Thank you for your comment and suggestion. Gridrad has a temporal resolution of 1 hour. We added “hourly” before “source datasets” in Line 131 in the revised main manuscript.

*‘Hourly source datasets are used in the generation of the MCS dataset, including the National Centers for Environmental Prediction (NCEP)/the Climate Prediction Center (CPP) L3 4 km Global Merged IR V1 brightness temperature dataset (Janowiak et al., 2017), the three-dimensional Gridded NEXRAD Radar (GridRad) dataset (Bowman & Homeyer, 2017), the NCEP Stage IV precipitation dataset (CDIACS/EOL/NCAR/UCAR & CPC/NCEP/NWS/NOAA, 2000), and melting level heights derived from ERA5 (European Centre for Medium-Range Weather Forecasts (ECMWF) Reanalysis v5) (Hersbach et al., 2023).’*

*I believe the results you state starting at about line 422 reflect some of the harm done by choices you made that I take issue with in my earlier comments. You do mention your reduction in wind threshold, but this could likely have been avoided had you used the SED instead of the surface wind network. Likewise, your overestimate compared to other studies is probably influenced by your unusual choice to reduce the MCS longevity criterion. You should try using a longer threshold than 6 hours to see how the numbers change. I do not believe you have made a case as to why you needed to reduce it to 6 hours. If your line 433 is implying that there may be derechos in the SPC database that are not really derechos since they did not come from organized convection, I highly doubt that. SPC usually avoids even showing wind damage reports unless they are clearly due to convection. There is no way I can conceive that a system would get listed as a derecho, because of that path length requirement), if it did NOT come from an MCS. Perhaps I have misinterpreted what you say in line 433, but if so, you need to be more direct in explaining why your MCS criteria is so important. From what I know about the SPC*

*database, all events being called derechos had to be MCSs. For your AI work, obviously you need to have some criteria to ensure a system is an MCS, but when humans classify derechos, they are automatically ensuring this. Thus, I think the only impact of your MCS criteria would be if you are comparing your number of cases to numbers in other studies that used AI to classify derechos (and presumably to explain why you should end up with a smaller number than other studies that may not have bothered to ensure the winds were happening due to an MCS). In the context here, in your paper, however, I do not believe it makes sense.*

Reply:

Thank you for your comment and suggestion. Since we now include the SED-based dataset in the study, we have rewritten Section 5 about the evaluation and uncertainties of our dataset. Please also see above for our answers and clarifications.

*Your discussion around line 450 again seems like it is needed there only because you did not use the SED database. If you had, you could avoid having to explain so many possible caveats.*

*Once again, starting around line 552, this discussion is reflecting the serious flaw in your design of your experiment. You chose to define derechos in a way inconsistent with the already problematic fact that at least two standard definitions exist. It is like you chose to study cats, but are calling them dogs, and now you are having to explain numerous differences between your study and prior ones. Because you used a different definition, it is impossible to know how serious the differences are. As I stated earlier, you are really just identifying bow echoes that were associated with strong winds. Not derechos. The question here becomes, is there a physical reason why strong wind bow echoes do not show the NW-SE swath of enhanced occurrence that is present for derechos? Or is there some fundamental issue with AI that is resulting in the difference. We cannot know because you chose to compare apples to oranges. The sensitivity test you do on line 554 is interesting and may offer some insight into my question above. But I believe your neglect of using the SED still complicates the interpretation you are providing here.*

Reply:

Thank you for your comment. In this study, we do not propose a new derecho definition but follow the definition from Corfidi et al. (2016). However, due to the limitation of some source datasets, we modify some thresholds, especially for those related to ISD gust speeds. This is a compromise. The derecho definition from Corfidi et al. (2016) is different from conventional ones. Since there are no other derecho climatologies based on Corfidi et al.'s definition, we can only compare our dataset with results based on conventional definitions. We disagree that this is a comparison between apples and oranges. The derecho definition is continuously evolving. Even the one in the AMS abstract you mentioned is different from previous definitions. On the other hand, the NW-SE swath of enhanced occurrence is observable in our updated yearly and monthly climatology (Figures 10, 12, S6, and S7), especially in July. For SED, please see our answers and clarifications in the above.



*In lines 593-594, it would have been good to try to compare your rather large percentage of wind reports being due to derechos and DFs to an estimate of what prior studies showed. I have a feeling your number is much higher, which is consistent with the fact that you are actually studying all bow echoes that produce strong wind, and not true derechos.*

Reply:

Thank you so much for your comments. We made a mistake with the calculation. We averaged the fractions of all sites. Since many sites have a few damaging gusts but the fractions are ~100%, averaging the fractions would overestimate the weight of sites with a few damaging gusts. We now just count the number of damaging gusts regardless of the sites, and the fraction reduces to ~3.0% based on our new dataset. Please see Lines 31 and 648 in the revised main manuscript.

“Additionally, during the study period, derechos account for approximately 3.1% of damaging gust reports ( $\geq 25.93 \text{ m s}^{-1}$ ) reports over the eastern United States.”

“On average, DMCSs contribute 4.0% and derechos contribute 3.1% of all damaging gust occurrences.”

## References

- Bowman, K. P., & Homeyer, C. R. (2017). *GridRad - Three-Dimensional Gridded NEXRAD WSR-88D Radar Data* the National Center for Atmospheric Research, Computational and Information Systems Laboratory. <https://doi.org/https://doi.org/10.5065/D6NK3CR7>
- CDIACS/EOL/NCAR/UCAR, & CPC/NCEP/NWS/NOAA. (2000). *NCEP/CPC Four Kilometer Precipitation Set, Gauge and Radar* the National Center for Atmospheric Research, Computational and Information Systems Laboratory. <https://doi.org/https://doi.org/10.5065/D69Z93M3>
- Corfidi, S. F., Coniglio, M. C., Cohen, A. E., & Mead, C. M. (2016). A proposed revision to the definition of “derecho”. *Bulletin of the American Meteorological Society*, 97(6), 935-949. <https://doi.org/https://doi.org/10.1175/BAMS-D-14-00254.1>
- Hersbach, H., Bell, B., Berrisford, P., Biavati, G., Horányi, A., Muñoz Sabater, J., Nicolas, J., Peubey, C., Radu, R., Rozum, I., Schepers, D., Simmons, A., Soci, C., Dee, D., & Thépaut, J.-N. (2023). *ERA5 hourly data on single levels from 1940 to present* Copernicus Climate Change Service (C3S) Climate Data Store (CDS). <https://doi.org/https://doi.org/10.24381/cds.adbb2d47>
- Janowiak, J., Joyce, B., & Xie, P. (2017). *NCEP/CPC L3 Half Hourly 4km Global (60S - 60N) Merged IR V1* Goddard Earth Sciences Data and Information Services Center (GES DISC). <https://doi.org/https://doi.org/10.5067/P4HZB9N27EKU>
